# Supplementary material for: Controllable synthesis of Ag@TiO2 heterostructures with enhanced photocatalytic activities under UV and visible excitation
Source: Royal Society of Chemistry journal article supplement (doi:10.1039/c5ra17762f), 2015-12-01
Supplement: c5ra17762f1.pdf [file c5ra17762f1.pdf]

**Controllable synthesis of Ag@TiO<sub>2</sub> heterostructure with enhanced photocatalytic activities under UV and Visible excitation**

Fanli Zhang,<sup>a</sup> Zhiqiang Cheng<sup>\*a,b</sup>, Liying Cui,<sup>a</sup> Tingting Duan,<sup>a</sup> Ahmed Anan,<sup>a</sup> Lijuan Kang,<sup>\*a</sup>

<sup>a</sup> College of Resources and Environment, Jilin Agriculture University, Changchun 130118, People's Republic of China

<sup>b</sup> School of Aerospace Engineering, Tsinghua University, Beijing, 100000, China.

\* Corresponding author E-mail: czq5974@163.com, kanglijuan61@126.com

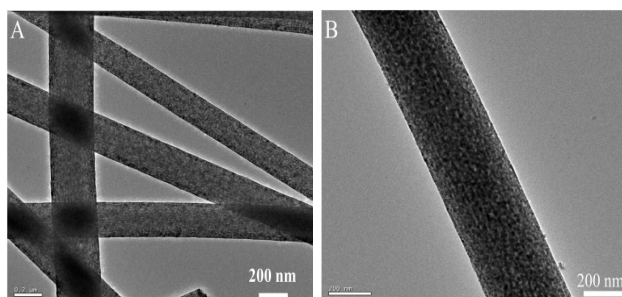

Fig. S1: TEM images of pure TiO<sub>2</sub> fibers. A: the low magnification TEM image of TiO<sub>2</sub> fibers and B: the single fiber of TEM image

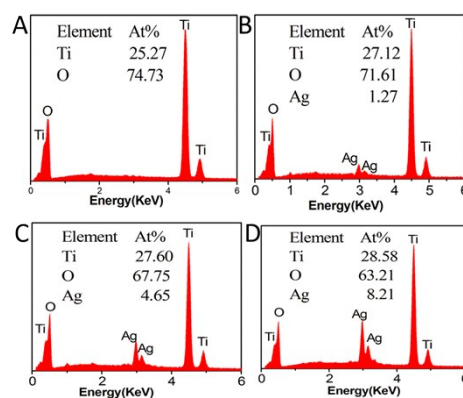

Fig. S2: The EDS spectra of pure TiO<sub>2</sub> fibers and Ag/TiO<sub>2</sub> (B, C and D were corresponding to the concentrations of 1 Mm, 0.01 M and 0.05 M Ag<sup>+</sup>)
